# Supplementary material
Source: publisher site journal article supplement (http://www.scielo.br/pdf/rsp/v57s3/1518-8787-rsp-57-suppl3-9s.pdf)
Supplement: Supplementary file 1 [file 1518-8787-rsp-57-suppl3-9s.pdf]

## Frailty and spatialization of older adults in the city of Uberlândia with IVCF-20

Rubia Pereira Barra<sup>I</sup> 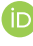, Edgar Nunes de Moraes<sup>II</sup> 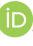, Maria Margaret de Vasconcellos Lemos<sup>III</sup> 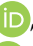,  
Poliana Castro de Resende Bonati<sup>IV</sup> 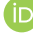, José Flávio Moraes Castro<sup>V</sup> 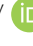, André Augusto Jardim<sup>VI</sup> 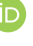

<sup>I</sup> Centro Colaborador Planificação da Atenção à Saúde Uberlândia. Conselho Nacional de Secretários de Saúde. Uberlândia, MG, Brazil

<sup>II</sup> Universidade Federal de Minas Gerais. Faculdade de Medicina. Departamento de Clínica Médica. Belo Horizonte, MG, Brazil

<sup>III</sup> Secretaria Municipal de Saúde. Uberlândia, MG, Brasil

<sup>IV</sup> Universidade de São Paulo. Escola de Enfermagem de Ribeirão Preto. Ribeirão Preto, SP, Brasil

<sup>V</sup> Pontifícia Universidade Católica de Minas Gerais. Programa de Pós-Graduação em Geografia. Belo Horizonte, MG, Brazil

<sup>VI</sup> Secretaria Municipal de Saúde. Coordenação de Saúde do Idoso. Uberlândia, MG, Brasil

### ABSTRACT

**OBJECTIVE:** To describe the functional clinical profile of elderly people linked to primary health care, using the Functional Clinical Vulnerability Index (IVCF-20) and to spatialize those with the greatest functional decline by primary health care units in the municipality of Uberlândia, in the state of Minas Gerais (MG), in the year 2022.

**METHODS:** A cross-sectional study with secondary data from the Municipal Health Department of Uberlândia-MG. The variables were compared using Student's t-test, Mann Whitney test, Pearson's chi-square, and multinomial logistic regression to obtain the independent effect of each variable. The significance level adopted was 5% ( $p < 0.05$ ). The georeferenced database in ArcGIS<sup>®</sup> was used.

**RESULTS:** 47,182 older adults were evaluated with a mean age of 70.3 years (60 to 113 years), 27,138 of whom were women (57.52%), with a clear predominance of low-risk or robust older adults (69.40%). However, 11.09% are high-risk older adults and 19.52% are at risk of frailty. Older men had independently lower odds of moderate and high risk compared to older women ( $OR = 0.53$ ;  $p < 0.001$ ). A high prevalence of polypharmacy was observed, 21.40% of the older adult population, particularly in frail older adults, with a prevalence of 63.08%. There was a greater distribution of frail older adults around the central region of the municipality and in health units with a larger coverage area. The IVCF-20 made it possible to screen frailty in primary health care.

**CONCLUSION:** The instrument is capable of stratifying the risk of older adults in health care networks through primary health care, enabling the application of individualized preventive, promotional, palliative, or rehabilitative interventions, according to the clinical functional stratum of the older adult and the compromised functional domains. Risk stratification and spatial distribution of the frailest older adults can be a good strategy for qualifying health professionals with the aim of maximizing the autonomy and independence of the older adults.

**DESCRIPTORS:** Health of the Elderly. Frailty. Primary Health Care. Public Health.

### Correspondence:

Poliana Castro de Resende Bonati  
Secretaria Municipal de Saúde  
Setor de Imunização  
Av. Ortizio Borges, 196  
38408-164 Uberlândia, MG, Brazil  
E-mail: polianabonati@ufu.br

**Received:** Dec 21, 2022

**Approved:** Oct 27, 2023

**How to cite:** Barra RP, Moraes EM, Lemos MMV, Bonati PCR, Castro JFM, Jardim AA. Frailty and spatialization of older adults in the city of Uberlândia with IVCF-20. Rev Saude Publica. 2023;57(Suppl 3):9s. <https://doi.org/10.11606/s1518-8787.2023057005273>

**Copyright:** This is an open-access article distributed under the terms of the Creative Commons Attribution License, which permits unrestricted use, distribution, and reproduction in any medium, provided that the original author and source are credited.

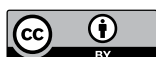

## INTRODUCTION

The aging of the population is associated with a greater risk of adverse outcomes, such as a higher prevalence of chronic and acute health conditions, functional dependence, hospitalization, institutionalization and death<sup>1</sup>. This greater vulnerability of older adults to illness and functional decline is known as frailty<sup>2-4</sup>. Various ways of operationalizing the concept of frailty are recognized, making it difficult to apply it in clinical practice and, consequently, to replicate and compare the various existing models in population-based studies<sup>5,6</sup>. The current consensus is that frailty is a multidimensional geriatric syndrome, with a dynamic character, associated with the reduction of homeostatic reserves, which progressively limits the ability to resist potential acute aggressors, causing cumulative and self-perpetuating deficits, culminating in functional decline, hospitalization, institutionalization and death<sup>7,8</sup>.

The variability in the concept of “frail older adults” is directly reflected in the use of different diagnostic instruments<sup>9,10</sup>. In order to standardize frailty risk stratification in the Brazilian older adult population and the recognition of the “frail older adult” by primary health care (PHC), the National Council of Health Secretaries (CONASS), in partnership with the Ministry of Health and the *Sociedade Beneficente Israelita Brasileira* (Hospital Albert Einstein), published a technical note suggesting the use of the Functional Clinical Vulnerability Index Assessment Instrument, IVCF-20<sup>a</sup>. The choice of IVCF-20 was based on its simplicity and quick application, and can be used by any health professional, including community health workers<sup>11</sup>. The instrument consists of 20 questions that assess the main functional clinical determinants of older adult health, with scores ranging from 0 to 40 points. The higher the value obtained, the greater the risk of clinical-functional vulnerability<sup>12-15</sup>. According to Faller et al.<sup>9</sup>, the IVCF-20 was recognized as one of the four best instruments in the world capable of recognizing frailty in the older adult population.

With an agreement signed with CONASS, the municipality of Uberlândia has acted as a collaborating center for *Planificação da Atenção à Saúde* (PAS – Health Care Planning) since 2017. With an estimated population of 706,597 inhabitants, of whom 108,793 are older adults (15.39%)<sup>16</sup>, as of December 2018, the organization of the *Rede de Atenção da Pessoa Idosa* (RASPI – Care Network of Older Adults) began under the PAS perspective. RASPI was organized based on the Chronic Conditions Care Model, developed to adapt to the requirements of a public and universal health care system such as SUS<sup>17</sup>.

The objective of this study is to evaluate the prevalence of frailty and describe the functional clinical profile of older adults living in the city of Uberlândia, identified via risk stratification carried out by IVCF-20, as well as to analyze the spatial distribution of frailty in the city by primary health units.

## METHODS

This is a cross-sectional study using secondary data, developed in the municipality of Uberlândia, located in the Triângulo Mineiro region, state of Minas Gerais.

Primary care is offered in 56 basic family health units (UBSF) that house 88 family health teams and 14 basic health units (UBS) with 78 primary care teams<sup>18</sup>.

The municipality's Health Department has worked with IVCF-20 to stratify the risk of older adults and has systematically trained health professionals since 2018, with regular clinical supervision by a specialized team.

Using the IVCF20, it is possible to carry out a clinical and functional assessment of people aged 60 and over<sup>9</sup>, the final score is calculated from the sum of the values attributed to each response (0 or 1), with three strata being defined: robust ( $\leq 6$  points), at risk of frailty (7 to 14 points) and frail ( $\geq 15$  points).

<sup>a</sup> Available from: <http://www.ivcf20.org>

Data crossing considered dimension, subdimension, questions and answers from IVCF20 used in risk stratification. Age was considered by age group.

Risk stratification data using the IVCF-20 was recorded, from 06/21/2018 to 04/30/2022, in its own electronic medical record, *Fast Medic*, used during care at health units.

Since this is a study using a secondary database, with no identification of users, other than the natural field for cross-referencing (*Cadastro de Pessoas Físicas* – CPF [the Brazilian tax identification number], processed exclusively within the database, without disclosure in the study), we considered it unnecessary to submit the project to the ethics committee, in accordance with Resolution No. 674, of May 6, 2022, in Chapter IX.

The mass of data was generated from two reports extracted from the information system, with the IVCF20 responses and the risk stratification of the older adults treated at UBSF and UBS:

- I. Elderly report: presents the list of all older adults registered in the older adult program and the corresponding risk stratification;
- II. Questionnaire report: includes users and their respective questions and answers given to IVCF20.

The reports were extracted in Excel format (@Microsoft) and included, each one, as a table in an Access database (@Microsoft), where the processing was carried out. The fields used in the study are described in Chart.

Initially, the records were selected using the CPF as an identifier, to link the data from the two tables, respecting the provisions of Law 13,709 of 2018<sup>19</sup>.

Records with the most recent responses were then selected from the questionnaire report table, as the IVCF20 may have been answered more than once, by the same individual, during the study period, as the database is cumulative.

The inclusion criteria in the study were:

- I. User of health units aged 60 or over who had the risk recorded in the older adult report;
- II. User who had answered at least 15 questions in the IVCF20 questionnaire;

**Chart.** Relationship, description, and origin of the fields that made up the study's data mass.

| Item | Field                   | Description                                             | Source report          |
|------|-------------------------|---------------------------------------------------------|------------------------|
| 1    | User CPF                | User's CPF                                              | Common to both reports |
| 2    | Resp. follow-up         | User's follow-up unit                                   | Elderly Report         |
| 3    | Resp. user registration | User's registration unit                                | Elderly report         |
| 4    | Classification          | Risk stratification in the Elderly Program              | Elderly report         |
| 5    | Sex                     | User's gender (M or F)                                  | Elderly Report         |
| 6    | Age                     | User's age (age in years)                               | Elderly report         |
| 7    | Dt. birth               | User's date of birth                                    | Elderly Report         |
| 8    | Dt. classification      | Date of completion of the current risk stratification   | Elderly report         |
| 9    | Dt. response            | Date on which the IVCF-20 questionnaire was carried out | Questionnaires Report  |
| 10   | Question                | Questionnaire question (one line for each question)     | Questionnaires Report  |
| 11   | Response                | Answer to the respective questionnaire question         | Questionnaires Report  |

CPF: *Cadastro de Pessoas Físicas*; IVCF-20: Functional Clinical Vulnerability Index; M: male; F: Female.

III. User whose CPF was provided in both reports;

IV. User with Dt. Classification equal to most recent Dt. response.

Statistical tests were performed using Bioestat 5.0. The sample consisted of 47,182 individuals aged 60 and over, with an estimated population of 108,793 in the same age group<sup>16</sup>. The chi-square test for adherence was significant ( $p = 0.99$ ), indicating the representativeness of the sample.

Student's t- and Mann Whitney tests were used for the variables age and sex; Pearson's chi-square in the analysis of risk prevalence for each sex.

Simple multinomial logistic regression (Biostat 5.0), to obtain the independent effect, was applied to the variables age, sex, negative self-perception of health, cognition, mood and polypharmacy on the chance of occurrence in a given risk stratum, being compared with the robust stratum, which was considered the gold standard because it was the best condition, the significance level was 5% ( $p < 0.05$ ).

The mapping was carried out for the 73 health units (UBS and UBSF) in the city of Uberlândia-MG. A total of 5,175 cases of frail older adults were identified, 3,555 women and 1,620 men. A georeferenced database was produced in ArcGIS®, using health units by coverage area and neighborhoods in Uberlândia as a reference. In preparing the thematic maps, we adopted the technique of proportional geometric figures, circles, directly proportional to the intensity of vulnerability risk, containing 3 classes according to the number of older adults: 1 to 10; 10 to 100; 100 to 500.

## RESULTS

Currently, around 63,784 elderly people are stratified by IVCF-20, representing 58.61% of the older adult population. After applying the selection criteria, the final sample consisted of 47,182 older adults. The prevalence of robust patients was greater than 80% among those aged 60 to 69 years, decreasing with advancing age, reaching 4.20% among patients aged 100 years or over. There was a predominance of women (27,138) compared to men (20,044) (Table 1).

Ages ranged between 60 and 113 years, with a mean of 70.3 years ( $SD = 7.8$ ). There was a predominance of women (57.52%) and most of the older adults were considered robust (69.40%). The prevalence of robust patients was greater than 80% among those aged 60 to 69 years, decreasing with advancing age, reaching 4.20% among patients aged 100 years or over (Table 2).

There was a significant correlation between age and frailty ( $p < 0.001$ ), with frailty being more prevalent in women ( $p < 0.001$ ). The prevalence of low risk was higher among men (75.60%), and moderate and high risk was more prevalent among women ( $p < 0.001$ ) (Table 2).

The perception of fair or poor health was high, present in 31.54% of the older adult population. Dependence for instrumental and basic daily living activities (DLAs) was present in 13.67% and 4.85% of the older adults, respectively. Consistent cognitive complaints were present in 24.83% of the population, characterizing a strong suspicion of major neurocognitive disorder. Suspicion of dementia was present in 7.60% of the older adults. The prevalence of suspected mood disorders was high, 27.40% (Chart).

Repeated falls were present in 8.12% of the older adults and a high prevalence of significant gait changes was observed (16.06%). Nutritional problems were observed in 5.65% of the older adults, and a strong suspicion of sarcopenia was observed in 11.69%, due to slow gait speed, considered the main predictor of sarcopenia in older adults. Sphincter incontinence had a prevalence of 10.61%. Significant visual problems were present in 15.93% of the elderly, in addition to hearing changes (9.13%). The biggest highlight was the high prevalence of polypharmacy, present in 21.40% of the older adult population, particularly in frail older adults, 63.08% (Table 1).

Men, when compared with women, had a lower chance of moderate (OR = 0.63; 95%CI 0.60–0.66;  $p < 0.001$ ) and high (OR = 0.53; 95%CI 0.50–0.57;  $p < 0.001$ ) risk. Compared to robust older adults, the results showed that negative self-perception of health had greater odds in older adults at risk of frailty (OR = 6.48; 95%CI 6.16–6.81;  $p < 0.001$ ) and frail older adults (OR = 19.95; 95%CI 18.53–21.49;  $p < 0.001$ ). The chance of occurrence of cognitive complaints was 6.69 (95%CI 6.34–7.06) times higher among those at risk of frailty and 19.78 (95%CI 18.45–21.20;  $p < 0.001$ ) among the frail ones. The suspicion of depression was higher

**Table 1.** Distribution of the sample according to demographic and health aspects, among older adults in the city of Uberlândia (n = 47,182).

| Health dimension                            | Robust |       | At risk of frailty |       | Frail |       | Total  |       |
|---------------------------------------------|--------|-------|--------------------|-------|-------|-------|--------|-------|
|                                             | n      | %     | n                  | %     | n     | %     | n      | %     |
| Age years)                                  |        |       |                    |       |       |       |        |       |
| 60–69                                       | 20,646 | 80.1  | 3,796              | 14.7  | 1,338 | 5.2   | 25,780 | 100   |
| 70–79                                       | 9,758  | 66.1  | 3,353              | 22.7  | 1,648 | 11.2  | 14,759 | 100   |
| 80–89                                       | 2,172  | 39.3  | 1,762              | 31.9  | 1,598 | 28.9  | 5,532  | 100   |
| 90–99                                       | 164    | 15.4  | 287                | 27    | 613   | 57.6  | 1,064  | 100   |
| ≥ 100                                       | 2      | 4.2   | 10                 | 21.3  | 35    | 74.5  | 47     | 100   |
| Total                                       | 32,742 | 69.4  | 9,208              | 19.52 | 5,232 | 11.09 | 47,182 | 100   |
| Sex                                         |        |       |                    |       |       |       |        |       |
| Female                                      | 17,956 | 64.8  | 5,952              | 21.9  | 3,590 | 13.2  | 27,138 | 100   |
| Male                                        | 15,146 | 75.6  | 3,256              | 16.2  | 1,642 | 8.2   | 20,044 | 100   |
| Self-perceived health                       |        |       |                    |       |       |       |        |       |
| Excellent, very good, or good               | 27,124 | 83.26 | 3,972              | 43.41 | 1,040 | 19.95 | 32,136 | 68.46 |
| Fair or poor                                | 5,454  | 16.74 | 5,177              | 56.59 | 4,174 | 80.05 | 14,805 | 31.54 |
| Daily living activities                     |        |       |                    |       |       |       |        |       |
| Functional dependence for instrumental DLAs | 505    | 1.55  | 2,145              | 23.45 | 3,767 | 72.25 | 6,417  | 13.67 |
| Functional dependence for basic DLAs        | 33     | 0.1   | 284                | 3.11  | 1,953 | 37.52 | 2,270  | 4.85  |
| Cognition                                   |        |       |                    |       |       |       |        |       |
| Cognitive complaints                        | 3,678  | 11.32 | 4,227              | 46.09 | 3,730 | 71.63 | 11,635 | 24.83 |
| Suspected dementia                          | 183    | 0.59  | 889                | 10.12 | 2,350 | 46.33 | 3,422  | 7.6   |
| Mood                                        |        |       |                    |       |       |       |        |       |
| Suspected depression                        | 3,946  | 12.24 | 4,991              | 54.8  | 3,813 | 73.72 | 12,750 | 27.4  |
| Mobility                                    |        |       |                    |       |       |       |        |       |
| Decline in reaching, grasping and pinching  | 618    | 1.91  | 995                | 10.95 | 1,753 | 33.87 | 3,366  | 7.23  |
| Aerobic and/or muscular capacity            |        |       |                    |       |       |       |        |       |
| Weight loss                                 | 474    | 1.68  | 808                | 10.24 | 1,020 | 22.49 | 2,302  | 5.65  |
| BMI < 22                                    | 527    | 2.14  | 428                | 6.64  | 455   | 12.89 | 1,410  | 4.07  |
| CC < 31 cm                                  | 430    | 1.78  | 475                | 7.56  | 576   | 16.73 | 1,481  | 4.38  |
| Gait speed > 5s                             | 729    | 2.99  | 1,376              | 21.49 | 1,918 | 52.98 | 4,023  | 11.69 |
| Gait                                        |        |       |                    |       |       |       |        |       |
| Gait change                                 | 915    | 2.84  | 2,686              | 29.61 | 3,860 | 74.6  | 7,461  | 16.06 |
| Repeated falls                              | 634    | 1.99  | 1,303              | 14.57 | 1,797 | 35.16 | 3,734  | 8.12  |
| Continence                                  |        |       |                    |       |       |       |        |       |
| Sphincter incontinence                      | 920    | 2.87  | 1,635              | 18.2  | 2,347 | 45.65 | 4,902  | 10.61 |
| Communication                               |        |       |                    |       |       |       |        |       |
| Significant vision decline                  | 2,650  | 8.24  | 2,536              | 28.03 | 2,199 | 42.66 | 7,385  | 15.93 |
| Significant hearing decline                 | 1,062  | 3.33  | 1,492              | 16.61 | 1,644 | 32.12 | 4,198  | 9.13  |
| Multiple comorbidity                        |        |       |                    |       |       |       |        |       |
| Polypathology                               | 489    | 1.54  | 1,077              | 12.1  | 1,292 | 25.68 | 2,858  | 6.27  |
| Polypharmacy                                | 2,624  | 8.31  | 3,924              | 43.68 | 3,219 | 63.08 | 9,767  | 21.4  |
| Recent hospitalization                      | 507    | 1.63  | 944                | 10.83 | 1,106 | 22.19 | 2,557  | 5.72  |

DLAs: Daily living activities.

in older adults at risk of frailty (OR = 8.69; 95%CI 8.24–9.17;  $p < 0.001$ ) and in the frail ones (OR = 20.12; 95%CI 18.75–21.59;  $p < 0.001$ ). The odds of daily use of multiple medications (polypharmacy) were higher in older adults at risk of frailty (OR = 8.55; 95%CI 8.07–9.05;  $p < 0.001$ ) and in the frail ones (OR = 18.84; 95%CI 17.57–20.19;  $p < 0.001$ ) (Table 3).

**Table 2.** Description of age and sex according to risk classification categories.

| Characteristic        | Risk stratification |              |              |              | p-value |
|-----------------------|---------------------|--------------|--------------|--------------|---------|
|                       | Low                 | Moderate     | High         | Total        |         |
|                       | n (%)               | n (%)        | n (%)        | n (%)        |         |
| Age (range; years)    |                     |              |              |              |         |
| Mean (SD)             | 68.5 (6.4%)         | 72.8 (8.3%)  | 77.4 (9.7%)  | 70.3 (7.8%)  | < 0.001 |
| Median (IQR)          | 67 (9%)             | 72 (13%)     | 77 (16%)     | 68 (11%)     | < 0.001 |
| Minimum; maximum      | 60; 104             | 60; 113      | 60; 109      | 60; 113      |         |
| Age (category; years) |                     |              |              |              |         |
| 60–69                 | 20,646 (80.1)       | 3,796 (14.7) | 1,338 (5.2)  | 25,780 (100) | < 0.001 |
| 70–79                 | 9,758 (66.1)        | 3,353 (22.7) | 1,648 (11.2) | 14,759 (100) |         |
| 80–89                 | 2,172 (39.3)        | 1,762 (31.9) | 1,598 (28.9) | 5,532 (100)  |         |
| 90–99                 | 164 (15.4)          | 287 (27.0)   | 613 (57.6)   | 1,064 (100)  |         |
| ≥ 100                 | 2 (4.2)             | 10 (21.3)    | 35 (74.5)    | 47 (100)     |         |
| Sex                   |                     |              |              |              |         |
| Female                | 17,956 (64.8)       | 5,952 (21.9) | 3,590 (13.2) | 27,138 (100) | < 0.001 |
| Male                  | 15,146 (75.6)       | 3,256 (16.2) | 1,642 (8.2)  | 20,044 (100) |         |

SD: standard deviation; IQR: interquartile range.

**Table 3.** Odds ratios for frailty and risk of frailty in relation to robust individuals in the municipality of Uberlândia, in the state of Minas Gerais.

| Category                               | Odds ratio (95%CI)  | p-value  |
|----------------------------------------|---------------------|----------|
| At risk of frailty (reference: robust) |                     |          |
| Negative self-perception of health     | 6.48 (6.16–6.81)    | < 0.0001 |
| Presence of cognitive complaints       | 6.69 (6.34–7.06)    | < 0.0001 |
| Presence of depressive complaints      | 8.69 (8.24–9.17)    | < 0.0001 |
| Polypharmacy                           | 8.55 (8.07–9.05)    | < 0.0001 |
| Frail (robust reference)               |                     |          |
| Negative self-perception of health     | 19.95 (18.53–21.49) | < 0.0001 |
| Presence of cognitive complaints       | 19.78 (18.45–21.20) | < 0.0001 |
| Presence of depressive complaints      | 20.12 (18.75–21.59) | < 0.0001 |
| Polypharmacy                           | 18.84 (17.57–20.19) | < 0.0001 |
| At risk of frailty (reference: robust) |                     |          |
| Age (reference: 60–69 years)           |                     |          |
| 70–79                                  | 1.89 (1.79–1.99)    | < 0.001  |
| 80–89                                  | 4.43 (4.12–4.76)    | < 0.001  |
| 90–99                                  | 9.42 (7.74–11.5)    | < 0.001  |
| ≥ 100                                  | 27.70 (6.05–127)    | < 0.001  |
| Male (reference: female)               | 0.63 (0.60–0.66)    | < 0.001  |
| Frail (robust reference)               |                     |          |
| Age (reference: 60 to 69 years old)    |                     |          |
| 70–79                                  | 2.64 (2.44–2.84)    | < 0.001  |
| 80–89                                  | 11.4 (10.5–12.4)    | < 0.001  |
| 90–99                                  | 56.9 (47.4–68.3)    | < 0.001  |
| ≥ 100                                  | 277 (66.5–1.153 )   | < 0.001  |
| Male (reference: female)               | 0.53 (0.50–0.57)    | < 0.001  |

95%CI: 95% confidence interval.

The mapping identified the health units with the highest prevalence of frailty, the spatialization of the data showed that the geographic distribution and areas of concentration of frail older adults is random, with a greater concentration around the central urban area and in health units with the largest population under their care. There was a predominance of frailty in women, approximately twice as high, particularly at UBS Tocantins, UBS Brasil, UBS D. Zulmira, UBS Luizote, UBS Martins, UBS Pampulha, UBS Patrimônio, UBS Planalto, UBS Roosevelt, and UBS Tibery (Figure).

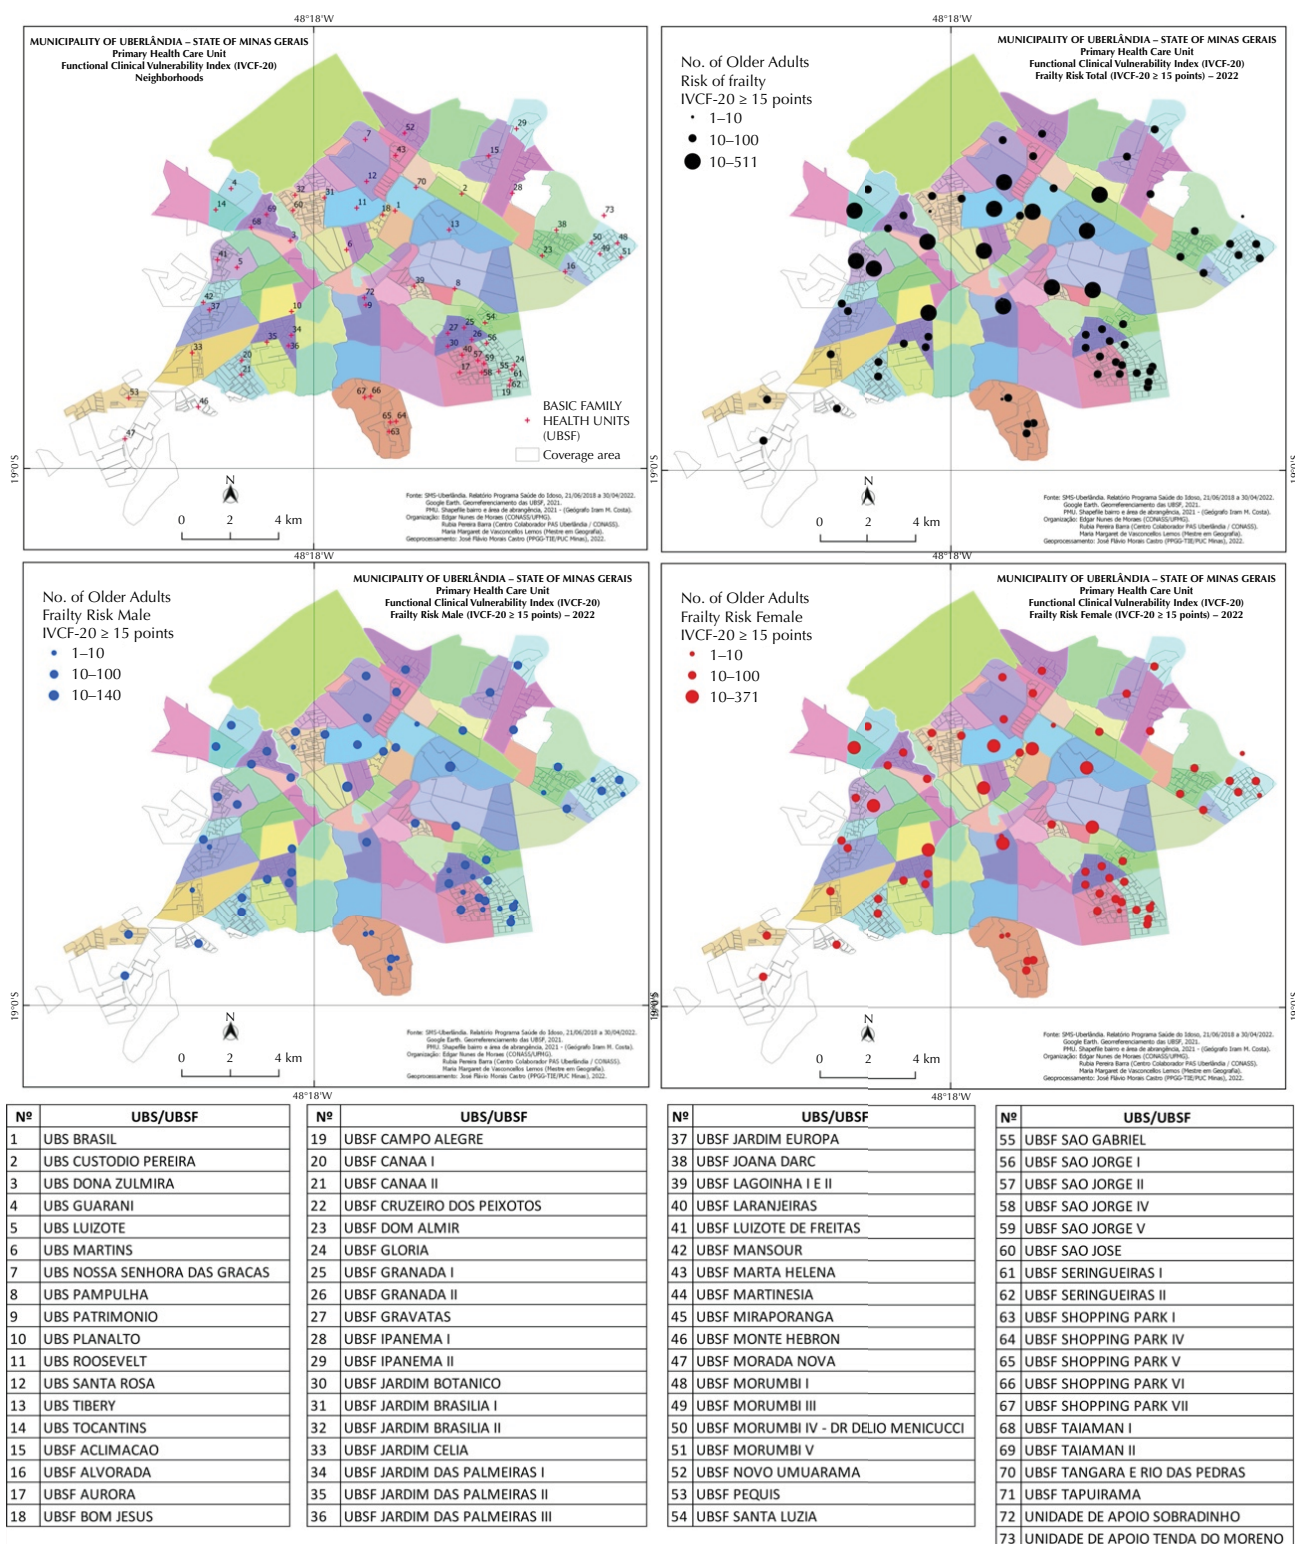

UBS: basic health units; UBSF: basic family health units

**Figure.** Spatialization of frail older adults, considering their basic health unit of registry and sex, in the municipality of Uberlândia, in the state of Minas Gerais

## DISCUSSION

This work is pioneering in Brazil, representing the first Brazilian population-based study that evaluated the entire older adult population of a medium-sized municipality, using the Functional Clinical Vulnerability Index-20 (IVCF-20). The prevalence of frailty was 30.61%, (IVCF-20  $\geq$  7 points), while older adults with high clinical functional vulnerability (IVCF  $\geq$  15 points) were present in 11.09%. Other studies using the same instrument demonstrated a variation of 12% to 20% in high-risk older adults<sup>20–23</sup>.

Most older adults have low clinical and functional vulnerability—according to several authors<sup>7–10,15</sup> and Moraes<sup>24</sup>—whose health management can be carried out by PHC, following the principles of the risk pyramid model, recommended<sup>25</sup>, in Chronic Condition Care Model<sup>10</sup>.

Studies carried out on elderly people demonstrate a prevalence of robust, pre-frail and frail older adults of, respectively, 45%, 49.9%, and 5.2% using the criteria proposed by Fried et al.<sup>26</sup>

These variations can be explained due to the influence of demographic, social and economic factors, as well as access, use and care structure of health services<sup>14</sup>. Research that compared Uberlândia with two other Brazilian municipalities showed a high Human Development Index (HDI) and life expectancy<sup>27</sup>.

The variables related to the highest frequency of frailty were age and female gender. Other studies obtained the same finding, which can be explained by the lower concentration of lean mass and muscle strength in elderly women compared to older men<sup>7,8,10</sup>.

Negative self-perception of health was present in a third of the older adults and showed a dose-response gradient with the IVCF-20 score, confirming its importance as a marker of frailty. This finding was present in, respectively, 42.6%, 42.4%, 30.3%, and 28.8% of several studies<sup>5–7,9,10</sup>, reinforcing the importance of this marker of quality of life in older adults. However, another study showed 70% of negative self-perception. Notably, this finding is mainly associated with loss of autonomy and decline in functionality<sup>15</sup>. Another explanation is the difference in socioeconomic and demographic response options in each location. Research carried out demonstrated the association of the prevalence of negative self-rated health with worse indicators of income, education, and consumption classes<sup>28</sup>. Health perception, despite being a subjective measure, is considered a good indicator of the health status of older adults and may indicate the need for general health surveillance and implementation of public policies to improve quality of life.

The prevalence of functional dependence in at least one instrumental DLA (shopping, controlling finances and carrying out small household work) was 13.67%, while dependence for bathing was 4.85%. Research carried out using the same instrument demonstrated the prevalence of dependence for some DLA ranging from 55.9% to 21.6%. This variation can be explained by the region of the country and measurement methodologies. In relation to basic DLA (stopped taking a shower alone), similar studies showed little variation, corroborating our results<sup>14,20–22</sup>.

Cognitive capacity is one of the domains of intrinsic capacity and must be routinely assessed by PHC, according to the Integrated Care for Older People (ICOPE)<sup>29</sup>. There was a high prevalence of cognitive complaints in the older adults evaluated and the suspicion of major neurocognitive disorder was 7.6%, which coincides with the study, in which the prevalence of dementia in Brazil was 7.1%<sup>30</sup>.

In turn, the prevalence of suspected depression was high (27.4%), in one study, a prevalence of depression was observed in 14.5% of older adults<sup>31</sup>. Another relevant finding of our study was the high correlation between suspected depression and an increase in the IVCF-20 score, confirming the high association between these two chronic health conditions.

Evidence of malnutrition and slow gait speed were observed in, respectively, 5% and 11.69% of older adults in Uberlândia. Both criteria are highly suggestive of the presence of sarcopenia. Weight loss, low BMI, calf circumference less than 31 cm and, mainly, slow gait are suggested instruments for early diagnosis<sup>32</sup>. The prevalence of sarcopenia is also heterogeneous, depending on the diagnostic criteria used, ranging from 10 to 27% of older adults. We observed the prevalence of postural instability (presence of some difficulty in walking that could prevent the performance of some daily activity) and repeated falls in, respectively, 16.06% and 8.12% of the older adults evaluated. Carneiro et al.<sup>15</sup> found a higher prevalence of repeated falls (27.9%), as well as limitations in walking (27.7%), probably attributed to the study design. The World Falls Guidelines (WFG) Task Force, recently published<sup>33</sup>, reinforces the importance of assessing gait in older adults and the presence of falls. In our study, the presence of significant decline in vision and hearing was, respectively, 15.93% and 9.13%, lower than what was observed by Carneiro et al.<sup>15</sup>, which was around 20% for both.

The high prevalence of polypharmacy (use of five or more medications per day) should be highlighted in our study, noticed in 21.4% of older adults and was highly correlated with the IVCF-20 score (dose-response gradient). Polypharmacy is the main risk factor for inappropriate prescription among older adults, present in 20 to 79%, depending on the criteria used, and is therefore quite common in clinical practice<sup>25</sup> and is considered an important marker of healthcare costs<sup>34</sup>.

The mapping of frail older adults allowed the situational diagnosis of the spatial distribution in the municipality, with the identification of the UBS with the highest concentration. The distribution was heterogeneous, with a greater concentration around the central area of the city, probably due to the larger population assigned to the UBS and because they are older neighborhoods. Another relevant point was the greater tendency for frailty to affect females, confirming the literature. This distribution pattern was similar to that observed by Freitas et al.<sup>21</sup>, who carried out similar work in the municipality of Pombal, Paraíba.

The study has limitations, such as the use of a questionnaire based on self-reported responses, which may suffer from memory bias. However, all answers were confirmed by the older adult's companion. The IVCF-20 does not replace the comprehensive geriatric assessment, considered the gold standard for geriatric-gerontological diagnosis<sup>35</sup>. Finally, risk stratification was carried out in 58.61% of the older adult population and around 30% of the IVCF-20 evaluated were excluded, due to the presence of inconsistency in the results.

## CONCLUSION

Risk stratification using the IVCF-20 allows screening of the clinical and functional vulnerability of the older adult population and understanding their main demands, facilitating the development of more specific guidelines and public policies. It also allows the definition of flows and counter-flows in the health care network, with a clearer definition of referral criteria for specialized outpatient care and its sizing. Risk stratification and spatial distribution of the frailest older adults can be a good strategy for qualifying health professionals with the aim of maximizing the autonomy and independence of the elderly.

## REFERENCES

1. Passos VMA, Champs AP, Teixeira R, Lima-Costa MF, Kirkwood R, Veras R, et al. The burden of disease among Brazilian older adults and the challenge for health policies: results of the Global Burden of Disease Study 2017. *Popul Health Metr.* 2020 Sep;18(S1 Suppl 1):14. <https://doi.org/10.1186/s12963-020-00206-3>

2. Gordon AL, Masud T, Gladman JR. Now that we have a definition for physical frailty, what shape should frailty medicine take? *Age Ageing*. 2014 Jan;43(1):8-9. <https://doi.org/10.1093/ageing/aft161>
3. Cesari M, Gambassi G, Kan GA, Vellas B. The frailty phenotype and the frailty index: different instruments for different purposes. *Age Ageing*. 2014 Jan;43(1):10-2. <https://doi.org/10.1093/ageing/aft160>
4. Martin FC, Brighton P. Frailty: different tools for different purposes? *Age Ageing*. 2008 Mar;37(2):129-31. <https://doi.org/10.1093/ageing/afn011>
5. Rodríguez-Mañas L, Féart C, Mann G, Viña J, Chatterji S, Chodzko-Zajko W, et al. Searching for an operational definition of frailty: a Delphi method based consensus statement: the frailty operative definition-consensus conference project. *J Gerontol A Biol Sci Med Sci*. 2013 Jan;68(1):62-7. <https://doi.org/10.1093/gerona/gls119>
6. Pialoux T, Goyard J, Lesourd B. Screening tools for frailty in primary health care: a systematic review. *Geriatr Gerontol Int*. 2012 Apr;12(2):189-97. <https://doi.org/10.1111/j.1447-0594.2011.00797.x>
7. Clegg A, Young J, Iliffe S, Rikkert MO, Rockwood K. Frailty in elderly people. *Lancet*. 2013 Mar;381(9868):752-62. [https://doi.org/10.1016/S0140-6736\(12\)62167-9](https://doi.org/10.1016/S0140-6736(12)62167-9)
8. Morley JE, Vellas B, Van Kan GA, Anker SD, Bauer JM, Bernabei R, et al. Frailty consensus: a call to action. *Journal of the American Medical Directors Association*. 2013; 14(6):392-7. <https://doi.org/10.1016/j.jamda.2013.03.022>
9. Faller JW, Pereira DD, Souza S, Nampo FK, Orlandi FS, Matumoto S. Instruments for the detection of frailty syndrome in older adults: A systematic review. *PLoS One*. 2019 Apr;14(4):e0216166. <https://doi.org/10.1371/journal.pone.0216166>
10. Caldas CP, Veras RP, Motta LB, Lima KC, Kisse CB, Trocado CV, et al. Rastreamento do risco de perda funcional: uma estratégia fundamental para a organização da Rede de Atenção ao Idoso. *Cien Saude Colet*. 2013 Dec;18(12):3495-506. <https://doi.org/10.1590/S1413-81232013001200006>
11. Ministério da Saúde(BR), Sociedade Beneficente Israelita Brasileira Albert Einstein. Nota técnica para organização da rede de atenção à saúde do foco na atenção primária à saúde e na atenção ambulatorial especializada: saúde da pessoa idosa. São Paulo: Hospital Israelita Albert Einstein, Ministério da Saúde. 2019.
12. Moraes EN, Lanna FM, Santos RR, Bicalho MA, Machado CJ, Romero D. A new proposal for the clinical-functional categorization of the elderly: Visual Scale of Frailty (VS-Frailty). *J Aging Res Clin Pract*. 2016;5(1):24-30. <https://doi.org/10.14283/jarcp.2016.84>
13. Freitas FF, Soares SM. Clinical-functional vulnerability index and the dimensions of functionality in the elderly person. *Rev Rene*. 2019;20:e39746. <https://doi.org/10.15253/2175-6783.20192039746>
14. Colares LM, Moraes EN, Costa SM, Caldeira AP. Fragilidade em idosos assistidos por equipes da atenção primária. *Cienc Saude Colet*. 2020 dez;25(12):5041-50. <https://doi.org/10.1590/1413-812320202512.04962019>
15. Carneiro JA, Souza AS, Maia LC, Costa FM, Moraes EM, Caldeira AP. Fragilidade em idosos comunitários: comparando instrumentos de triagem. *Rev Saude Publica*. 2020;54:119. <https://doi.org/10.11606/s1518-8787.2020054002114>
16. Ministério da Saúde (BR). Datasus. População residente: estudo de estimativas populacionais por município, idade e sexo 2000-2021: Brasil. [cited 2023 July 14]. Available from: <http://tabnet.datasus.gov.br/cgi/tabcgi.exe?ibge/cnv/popsvsbr.def>
17. Mendes EV. O cuidado das condições crônicas na atenção primária à saúde: o imperativo da consolidação da estratégia da saúde da família. Brasília, DF: Organização Pan-Americana da Saúde; 2012.
18. Secretaria Municipal de Saúde (Uberlândia). Carteira de serviços da atenção primária 2018 [cited 2023 Jul 25]. Available from: <http://docs.uberlandia.mg.gov.br/wp-content/uploads/2019/07/carteira-de-serviços.pdf>
19. BRASIL. Lei nº. 13.709, de 14 de agosto de 2018. Lei Geral de Proteção de Dados Pessoais (LGPD). *Diário Oficial União*, 2018 Ago 15.
20. Maia LC, Moraes EN, Costa SM, Caldeira AP. Fragilidade em idosos assistidos por equipes da atenção primária. *Cien Saude Colet*. 2020 Dec;25(12):5041-50. <https://doi.org/10.1590/1413-812320202512.04962019>

21. Freitas FF, Rocha AB, Moura AC, Soares SM. Fragilidade em idosos na Atenção Primária à Saúde: uma abordagem a partir do geoprocessamento. *Cien Saude Colet*. 2020 Nov;25(11):4439-50. <https://doi.org/10.1590/1413-812320202511.27062018>
22. Ribeiro ER, Mendoza IY, Moraes EN, Alvarenga MR, Cintra MR, Guimarães GL. Propriedades psicométricas do Índice de Vulnerabilidade Clínico-Funcional - 20 na Atenção Primária à Saúde. *REME*. 2020;24:e-1332. <https://doi.org/10.5935/1415.2762.20200069>
23. Melo BR, Luchesi BM, Barbosa GC, Pott Junior H, Martins TC, Gratão AC. Agreement between fragility assessment instruments for older adults registered in primary health care. *Rev Gaucha Enferm*. 2022 Aug;43:e20210257. <https://doi.org/10.1590/1983-1447.2022.20210257.en>
24. Moraes EN. A arte da (des)prescrição no idoso: a dualidade terapêutica. Ed Folium; 2018.
25. Mendes EV. Desafios do SUS. Brasília, DF: Conass; 2019.
26. Fried LP, Tangen CM, Walston J, Newman AB, Hirsch C, Gottdiener J, et al. Frailty in older adults: evidence for a phenotype. *J Gerontol A Biol Sci Med Sci*. 2001 Mar;56(3):M146-56. <https://doi.org/10.1093/gerona/56.3.M146>
27. Tasca R, Carrera MBM, Malik AM, Schiesari LMC, Bigoni A, Costa CF, et al. Gerenciando o SUS no nível municipal ante a Covid-19: uma análise preliminar. *Saude Debate*. 2022;46(spe1):15-32. <https://doi.org/10.1590/0103-11042022E101>
28. Antunes JL, Chiavegatto Filho AD, Duarte YA, Lebrão ML. Desigualdades sociais na autoavaliação de saúde dos idosos da cidade de São Paulo. *Rev Bras Epidemiol*. 2019 Feb;21(21 Suppl 02):e180010. <https://doi.org/10.1590/1980-549720180010.supl.2>
29. Organização Pan-Americana da Saúde. Atenção Integrada para a Pessoa Idosa (ICOPE): orientações sobre a avaliação centrada na pessoa e roteiros para a atenção primária. Washington, DC: Organização Pan-Americana da Saúde; 2020.
30. Herrera E Jr, Caramelli P, Silveira AS, Nitrini R. Epidemiologic survey of dementia in a community-dwelling Brazilian population. *Alzheimer Dis Assoc Disord*. 2002;16(2):103-8. <https://doi.org/10.1097/00002093-200204000-00007>
31. Lourenço RA, et al. Prevalência e fatores associados à fragilidade em uma amostra de idosos que vivem na comunidade da cidade de Juiz de Fora, Minas Gerais, Brasil: estudo FIBRA-JF. *Cienc Saude Coletiva*. 2019;24(1):35-44. <https://doi.org/10.1590/1413-81232018241.29542016>
32. Cruz-Jentoft AJ, Bahat G, Bauer J, Boirie Y, Bruyère O, Cederholm T, et al. Sarcopenia: revised European consensus on definition and diagnosis. *Age Ageing*. 2019 Jan;48(1):16-31. <https://doi.org/10.1093/ageing/afy169>
33. Montero-Odasso M, Velde N, Martin FC, Petrovic M, Tan MP, Ryg J, et al. World guidelines for falls prevention and management for older adults: a global initiative. *Age Ageing*. 2022 Sep;51(9):1-36. <https://doi.org/10.1093/ageing/afac205>
34. Hamilton H, Gallagher P, Ryan C, Byrne S, O'Mahony D. Potentially inappropriate medications defined by STOPP criteria and the risk of adverse drug events in older hospitalized patients. *Arch Intern Med*. 2011 Jun;171(11):1013-9. <https://doi.org/10.1001/archinternmed.2011.215>
35. Veronese N, Custodero C, Demurtas J, Smith L, Barbagallo M, Maggi S, et al. Comprehensive geriatric assessment in older people: an umbrella review of health outcomes. *Age Ageing*. 2022 May;51(5):1-9. <https://doi.org/10.1093/ageing/afac104>

**Authors' Contribution:** Study conception and planning: RPB, ENM, PCRB. Data collection, analysis and interpretation: RPB, ENM, PCRB, MMVL, JFMC. Preparation or review of the manuscript: ENM, RPB, PCRB, MMVL, AAJ. Final version approval: RPB, MMVL. Public responsibility for the content of the article: ENM, RPB, PCRB, MMVL, JFMC, AAJ.

**Conflict of Interest:** The authors declare no conflict of interest.
